# Supplementary material for: Efficient and reversible absorption of low pressure NH3by functional type V deep eutectic solvents based on phenol and hydroxypyridine
Source: Royal Society of Chemistry journal article supplement (doi:10.1039/d2nj04409a), 2022-01-01
Supplement: d2nj04409a1.pdf [file d2nj04409a1.pdf]

## **Supporting Information**

# **Efficient and Reversible Absorption of Low Pressure NH<sub>3</sub> by Functional Type V Deep Eutectic Solvents Based on Phenol and Hydroxypyridine**

**Ziyue Zhou, Renjiang Li, Ke Li, Kai Zong, Dongshun Deng\***

Zhejiang Province Key Laboratory of Biofuel, College of Chemical Engineering, Zhejiang

University of Technology, Hangzhou 310014, China

## The identification of present mixtures as DESs.

The melting points of 3-HP/PhOH (1:1.5, 1:2, 1:3, 1:5), 3-HP/TMP (1:5), 3-HP/MC (1:5), and PhOH and 2-HP/PhOH (1:5) were determined and presented in the corresponding solid-liquid equilibrium (SLE) as follows according to the literature methods.<sup>1,2</sup> The red lines were obtained using the melting points and  $\Delta_{\text{fus}}H$  (the enthalpy of fusion) of the two pure compounds. As can be seen, the melting points of prepared mixtures were far lower than the ideal eutectic point presented as  $T_{E, \text{ideal}}$ . Then, present mixtures can be named as real DESs according to the recommended definition.<sup>1,2</sup>

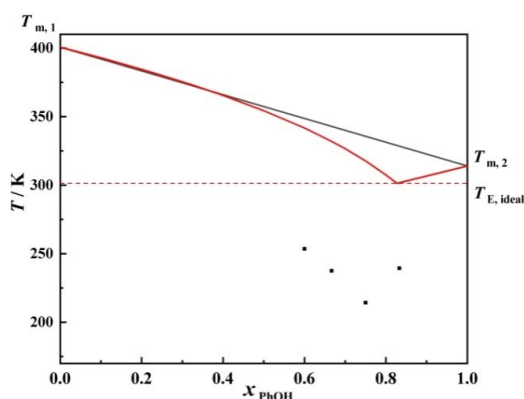

**Fig.S1** Schematic representation of the comparison of the SLE of 3-HP/PhOH

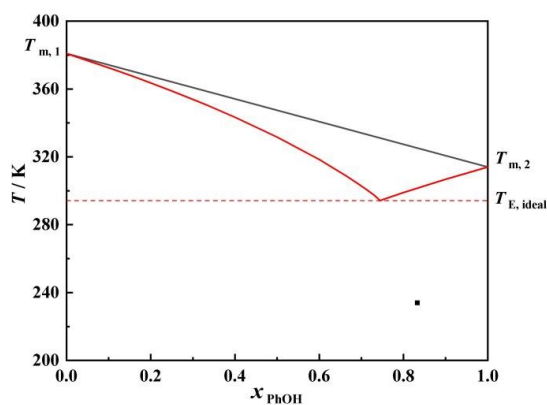

**Fig.S2** Schematic representation of the comparison of the SLE of 2-HP/PhOH (1:5)

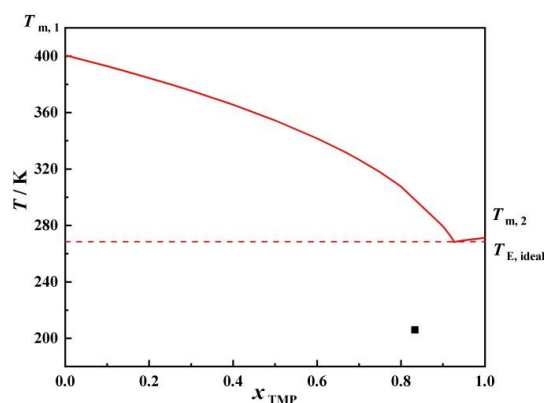

**Fig.S3** Schematic representation of the comparison of the SLE of 3-HP/TMP (1:5)

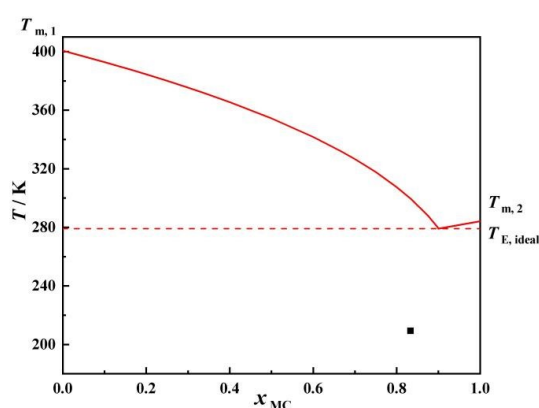

**Fig.S4** Schematic representation of the comparison of the SLE of 3-HP/MC (1:5)

**Table S1.** The melting point and fusion enthalpy of pure compounds.

| Coumpounds | $T_m$ (K) | Ref. | $\Delta_{\text{fus}}H$ (kJ/mol) | Ref.              |
|------------|-----------|------|---------------------------------|-------------------|
| MC         | 284.15    | 3    | 10.67                           | 8                 |
| PhOH       | 314.07    | 4    | 11.51                           | 8                 |
| 3-HP       | 400.15    | 5    | 17.70                           | DSC determination |
| 2-HP       | 380.65    | 6    | 14.78                           | DSC determination |
| TMP        | 271.35    | 7    | 15.54                           | 9                 |

## References

1. M. A. R. Martins, S. P. Pinho and J. A. P. Coutinho, *J. Solution Chem.*, 2019, **48**, 962-982.
2. M. Jablonský and J. Šima, *BioResources*, 2022, **17**, 3880-3882.
3. J. Kendall and J. J. Beaver, *J. Am. Chem. Soc.*, 1921, **43**, 8, 1853-1867.
4. A. E. Hill and W.M. Malisoff, *J. Am. Chem. Soc.*, 1926, **48**, 4, 918-927.
5. K.W. Anderson, T. Ikawa, R.E. Tundel and S.L. Buchwald, *J. Am. Chem. Soc.*, 2006, **128**, 33, 10694-10695.
6. J. H. Boyer and L. R. Morgan Jr., *J. Am. Chem. Soc.*, 1961, **83**, 4, 919-921.
7. F. Swarts, *Bull. Cl. Sci., Acad. R. Belg.*, 1913, P241-78 CAPLUS.
8. NIST Chemistry WebBook, SRD 69. <https://webbook.nist.gov/chemistry/cas-ser/>.
9. K. G. Joback and R. C. Reid, *Chem. Eng. Commun.*, 1987, **57**, 233-243.
